# Supplementary material
Source: PubMed Central journal article supplement (PMC5553960)
Supplement: supp_the2016-0450_onco12146-sup-0001-suppinfo1.pdf [file supp_the2016-0450_onco12146-sup-0001-suppinfo1.pdf]

Supplemental Table for:  
Impact of Age on Outcomes with Immunotherapy for Patients with Melanoma  
Ryan Sullivan et al.

**Table S1.** Patient characteristics.

| Characteristic                    | Center         |      |                       |      |
|-----------------------------------|----------------|------|-----------------------|------|
|                                   | MGH<br>(N=120) |      | Vanderbilt<br>(N=134) |      |
|                                   | N              | %    | N                     | %    |
| <b>Gender</b>                     |                |      |                       |      |
| Female                            | 46             | 38.3 | 52                    | 38.8 |
| Male                              | 74             | 61.7 | 82                    | 61.2 |
| <b>Education</b>                  |                |      |                       |      |
| High school                       | 21             | 17.5 | 35                    | 26.1 |
| Vocational/Some college           | 2              | 1.7  | 8                     | 6.0  |
| College graduate/Graduate school  | 65             | 54.2 | 52                    | 38.8 |
| Less than high school graduate    | 2              | 1.7  | 9                     | 6.7  |
| Unknown/Missing                   | 30             | 25.0 | 30                    | 22.4 |
| <b>Insurance</b>                  |                |      |                       |      |
| Government                        | 50             | 41.7 | 45                    | 33.6 |
| Private                           | 67             | 55.8 | 83                    | 61.9 |
| Self pay                          | 3              | 2.5  | 1                     | 0.7  |
| Unknown                           | -              | -    | 5                     | 3.7  |
| <b>Relationship status</b>        |                |      |                       |      |
| Divorced                          | 8              | 6.7  | 12                    | 9.0  |
| Married                           | 90             | 75.0 | 100                   | 74.6 |
| Single                            | 14             | 11.7 | 15                    | 11.2 |
| Unknown                           | -              | -    | 1                     | 0.7  |
| Widowed                           | 8              | 6.7  | 6                     | 4.5  |
| <b>Employment</b>                 |                |      |                       |      |
| Disabled                          | 4              | 3.3  | 8                     | 6.0  |
| Employed                          | 67             | 55.8 | 61                    | 45.5 |
| Retired                           | 44             | 36.7 | 52                    | 38.8 |
| Unemployed                        | 2              | 1.7  | 10                    | 7.5  |
| Unknown                           | 3              | 2.5  | 3                     | 2.2  |
| <b>ECOG PS</b>                    |                |      |                       |      |
| 0                                 | 77             | 64.2 | 44                    | 32.8 |
| 1                                 | 16             | 13.3 | 82                    | 61.2 |
| 2 or 3                            | 4              | 3.3  | 7                     | 5.2  |
| Missing                           | 23             | 19.2 | 1                     | 0.7  |
| <b>BRAF Mutation</b>              |                |      |                       |      |
| Yes                               | 24             | 20.0 | 35                    | 26.1 |
| No/Unknown                        | 96             | 80.0 | 99                    | 73.9 |
| <b>Melanoma Type</b>              |                |      |                       |      |
| Acral                             | 4              | 3.3  | 8                     | 6.0  |
| Cutaneous                         | 90             | 75.0 | 99                    | 73.9 |
| Mucosal                           | 6              | 5.0  | 5                     | 3.7  |
| Unknown                           | 9              | 7.5  | 18                    | 13.4 |
| Uveal                             | 11             | 9.2  | 4                     | 3.0  |
| <b>Received anti-PD-1 therapy</b> | 109            | 90.8 | 126                   | 94.0 |

Supplemental Table for:  
Impact of Age on Outcomes with Immunotherapy for Patients with Melanoma  
Ryan Sullivan et al.

| Characteristic                     | Center         |      |                       |      |
|------------------------------------|----------------|------|-----------------------|------|
|                                    | MGH<br>(N=120) |      | Vanderbilt<br>(N=134) |      |
|                                    | N              | %    | N                     | %    |
| <b>Received anti-PD-L1 therapy</b> | 11             | 9.2  | 8                     | 6.0  |
| <b>Ipi before PD-1</b>             |                |      |                       |      |
| No                                 | 67             | 55.8 | 58                    | 43.3 |
| Yes                                | 53             | 44.2 | 76                    | 56.7 |
| <b>Ipi after PD-1</b>              |                |      |                       |      |
| No                                 | 94             | 78.3 | 117                   | 87.3 |
| Yes                                | 25             | 20.8 | 17                    | 12.7 |
| During                             | 1              | 0.8  | -                     | -    |
| <b>Brain mets</b>                  |                |      |                       |      |
| No                                 | 108            | 90.0 | 100                   | 74.6 |
| Yes                                | 12             | 10.0 | 34                    | 25.4 |
| <b>Liver mets</b>                  |                |      |                       |      |
| No                                 | 98             | 81.7 | 83                    | 61.9 |
| Yes                                | 22             | 18.3 | 51                    | 38.1 |
| <b>LDH-mean (SD)</b>               | 304.1 (495.7)  |      | 333.3 (416.5)         |      |
| <b>CCI-mean (SD)</b>               | 4.3 (2.4)      |      | 4.9 (2.3)             |      |
| <b>Line of therapy – mean (SD)</b> | 1.5 (0.8)      |      | 2.4 (1.1)             |      |

Notable differences between centers for the following:

Chi-squared tests: Education,  $p=0.02$ ; ECOG PS,  $p < 0.0001$ ; brain mets,  $p=0.002$ ; liver mets,  $p=0.0005$ .

Wilcoxon rank-sum tests: CCI,  $p=0.03$ ; line of therapy,  $p < 0.0001$ .
